# Supplementary figures and images for: Improving selection of patients with metastatic colorectal cancer to benefit from cetuximab based on KIR genotypes
Source: PubMed Central journal article supplement — J Immunother Cancer. 2021 Apr 8;9(4):e001705. doi: 10.1136/jitc-2020-001705 (PMC8039212; doi:10.1136/jitc-2020-001705), 2021-04-08

**Fig. S1**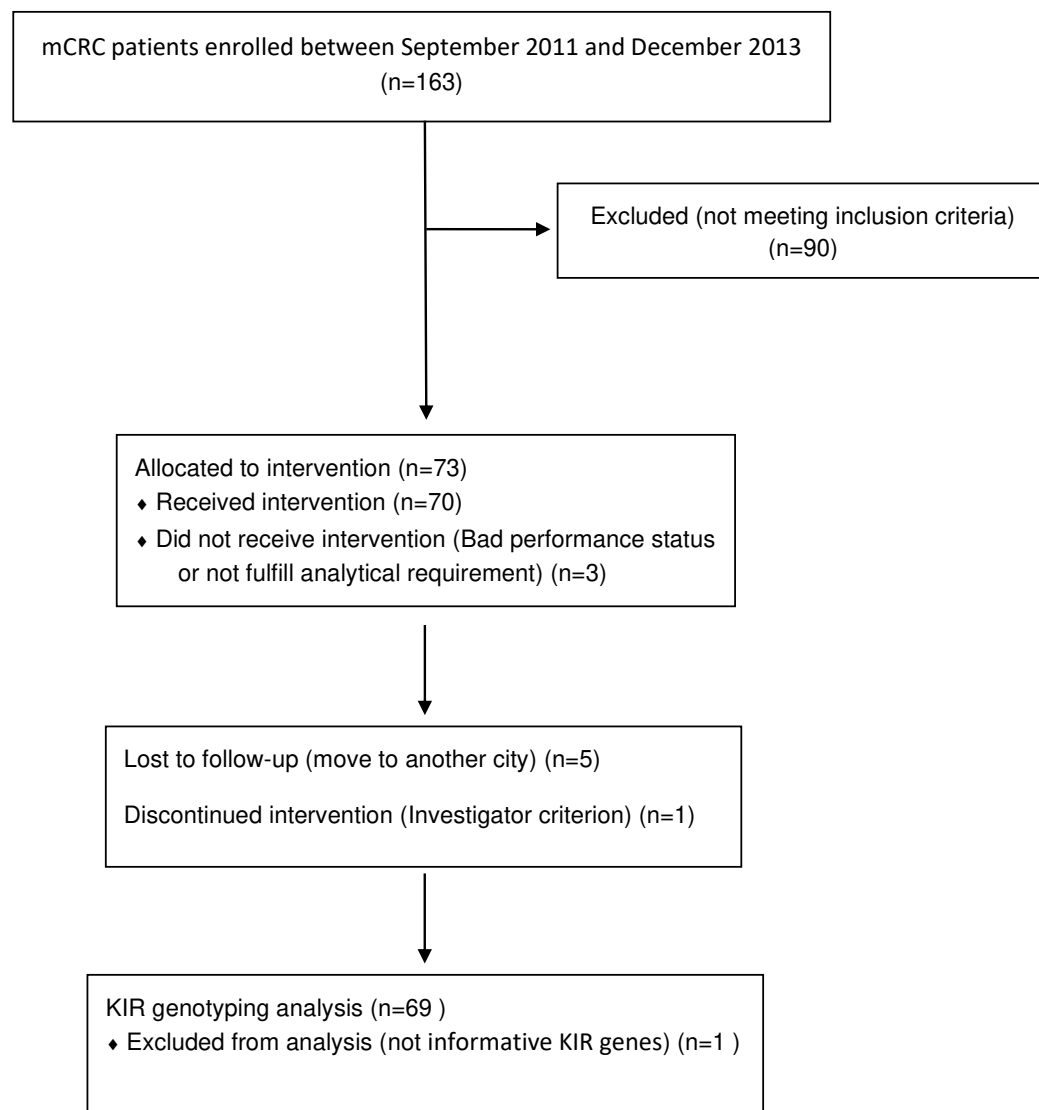

Supplement: jitc-2020-001705supp001.pdf [file jitc-2020-001705supp001.pdf]

Figure S2

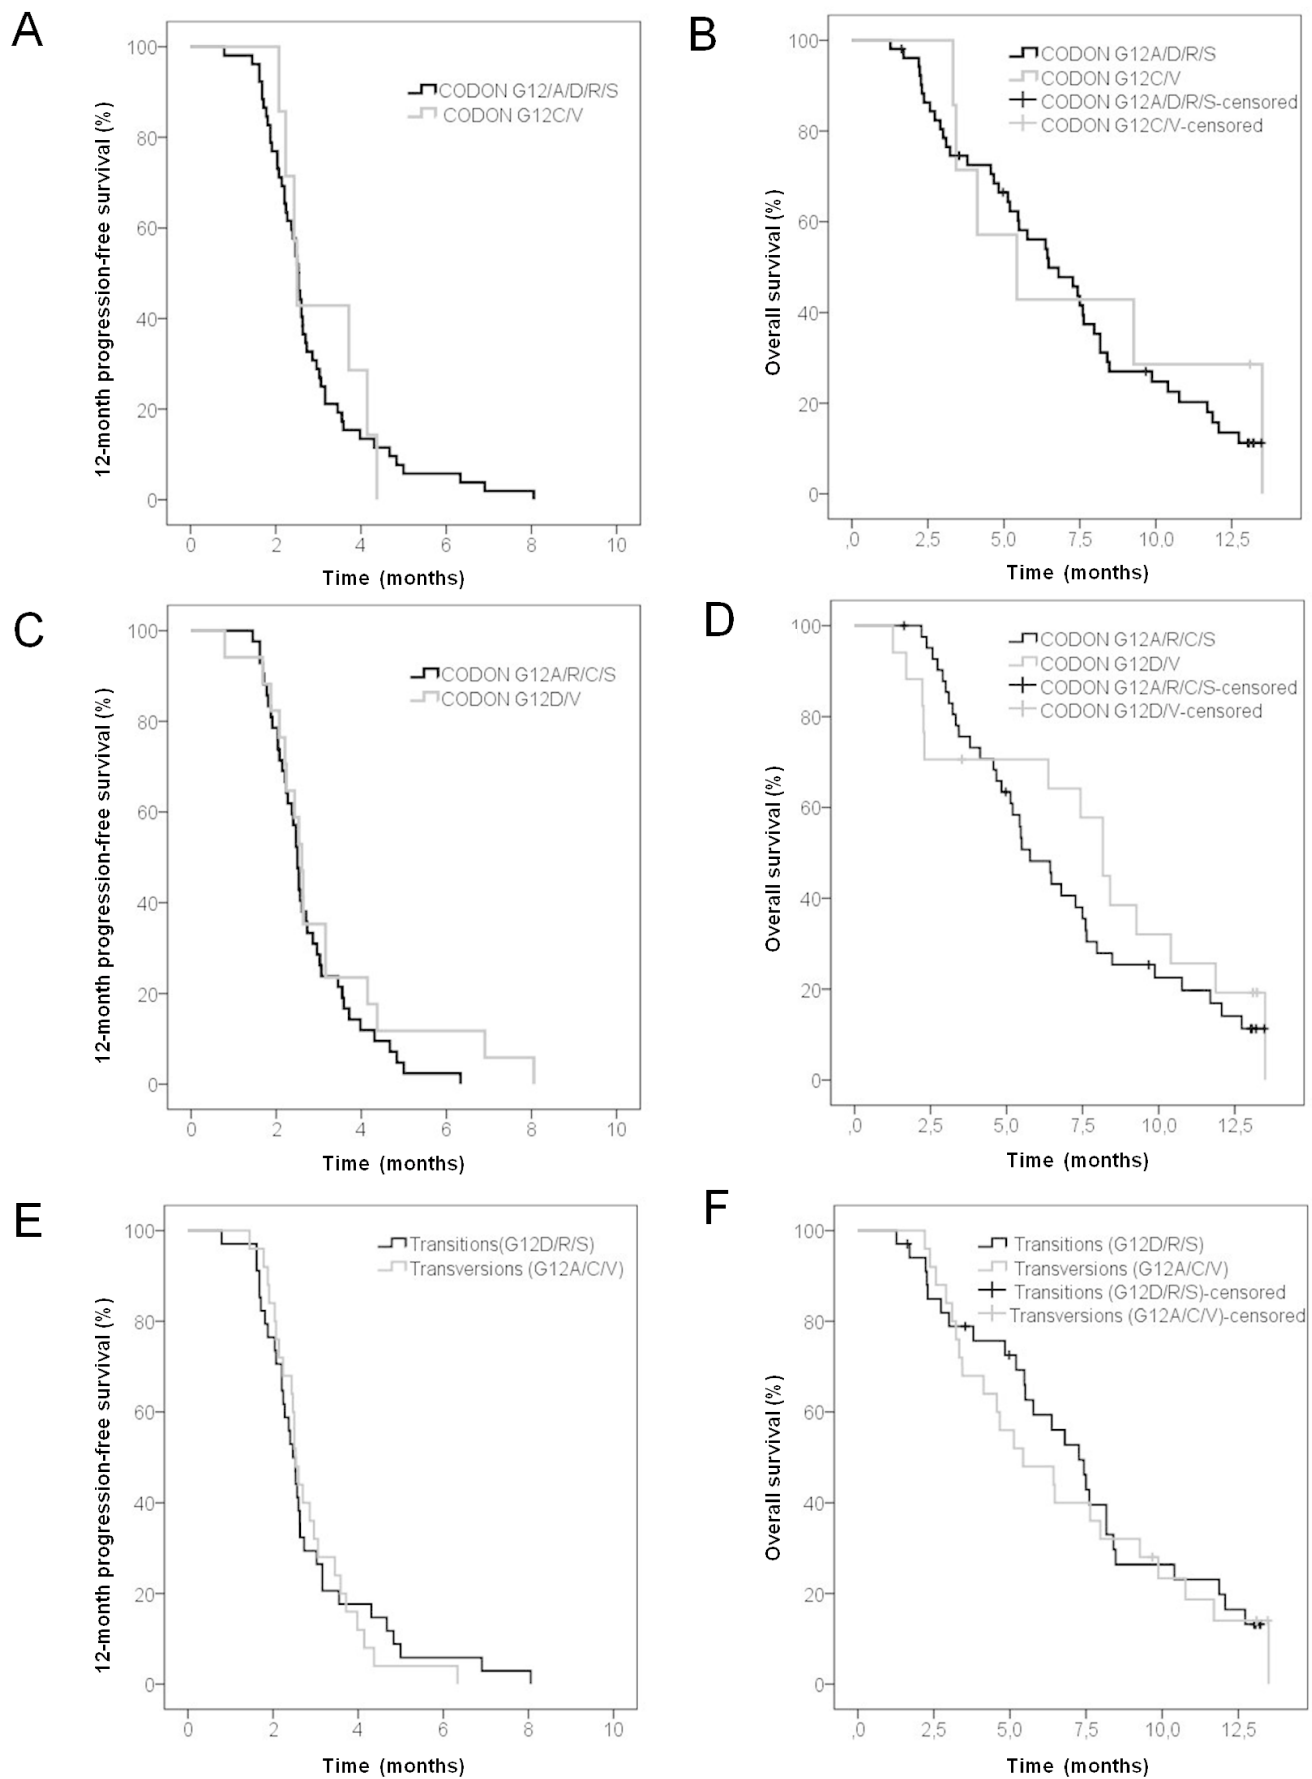

Supplement: jitc-2020-001705supp002.pdf [file jitc-2020-001705supp002.pdf]
